# Supplementary material for: Sustainable and green synthesis of C- and N-doped nanoporous g-C3N4: powerful sunlight-responsive photocatalysts for aerobic oxidation of toluene
Source: Royal Society of Chemistry journal article supplement (doi:10.1039/d2re00587e), 2023-01-01
Supplement: d2re00587e1.pdf [file d2re00587e1.pdf]

## Supporting Information

### Sustainable and Green Synthesis of C- and N-Doped Nanoporous g-C<sub>3</sub>N<sub>4</sub>: Powerful Sunlight-Responsive Photocatalysts for Aerobic Oxidation of Toluene

*Mina Tavakolain,<sup>a</sup> Mitra Jafari,<sup>b</sup> Mohammad Reza Ebrahimian,<sup>a</sup> Mohammad Reza Rahimpour,<sup>b\*</sup>, and Mona Hosseini-Sarvari<sup>a\*</sup>*

<sup>a</sup>Nano Photocatalysis Lab, Department of Chemistry, Shiraz University, Shiraz 7194684795, I.R. Iran.

<sup>b</sup>Department of Chemical Engineering, Shiraz University, Shiraz, 71345, Iran

Corresponding Authors:

Email: rahimpour@shirazu.ac.ir (M.R. Rahimpour)

Email: hossaini@shirazu.ac.ir, (M. Hosseini-Sarvari)

| <b>Table of Contents</b>                                 | <b>page</b> |
|----------------------------------------------------------|-------------|
| Elemental compositions (C H N) of the samples .....      | S2          |
| Optimization of reaction conditions.....                 | S2          |
| XPS survey pattern of prepared materials.....            | S3          |
| XRD pattern of reused catalyst (re-0.05%BTCN).....       | S4          |
| FTIR spectrum of reused photocatalyst (re0.05%BTCN)..... | S5          |
| Textural properties reused catalyst.....                 | S5          |
| GC diagrams.....                                         | S6          |

**Table S1:** Elemental compositions (C H N) of the samples

| Sample     | C     | H    | N     | N/C (mass ratio) |
|------------|-------|------|-------|------------------|
| 1%-BTCN    | 41.77 | 1.41 | 56.28 | 1.34             |
| 0.5%-BTCN  | 38.01 | 1.40 | 54.03 | 1.42             |
| 0.05%-BTCN | 36.10 | 1.36 | 61.47 | 1.70             |
| CN         | 37.33 | 1.25 | 53.90 | 1.44             |

**Table S2.** Optimization of reaction conditions <sup>a,b</sup>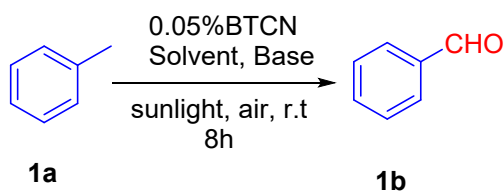

| Entry | Base                            | Solvent                                     | Yield (%) <sup>b</sup> |
|-------|---------------------------------|---------------------------------------------|------------------------|
| 1     | Cs <sub>2</sub> CO <sub>3</sub> | EtOH                                        | 55                     |
| 2     | Cs <sub>2</sub> CO <sub>3</sub> | H <sub>2</sub> O                            | 60                     |
| 3     | Cs <sub>2</sub> CO <sub>3</sub> | CH <sub>3</sub> CN                          | 25                     |
| 4     | Cs <sub>2</sub> CO <sub>3</sub> | H <sub>2</sub> O/CH <sub>3</sub> CN ( 1:1 ) | 75                     |
| 5     | Cs <sub>2</sub> CO <sub>3</sub> | H <sub>2</sub> O/CH <sub>3</sub> CN ( 1:9 ) | 38                     |
| 6     | Cs <sub>2</sub> CO <sub>3</sub> | H <sub>2</sub> O/CH <sub>3</sub> CN (9:1)   | 91                     |
| 7     | K <sub>3</sub> PO <sub>4</sub>  | H <sub>2</sub> O/CH <sub>3</sub> CN (9:1)   | 53                     |
| 8     | K <sub>2</sub> CO <sub>3</sub>  | H <sub>2</sub> O/CH <sub>3</sub> CN (9:1)   | 7                      |
| 9     | t-BuOK                          | H <sub>2</sub> O/CH <sub>3</sub> CN (9:1)   | 37                     |
| 10    | NaOH                            | H <sub>2</sub> O/CH <sub>3</sub> CN (9:1)   | 45                     |

|                 |                                 |                                           |       |
|-----------------|---------------------------------|-------------------------------------------|-------|
| 11              | DBU                             | H <sub>2</sub> O/CH <sub>3</sub> CN (9:1) | 4     |
| 12              | iPr <sub>2</sub> NEt            | H <sub>2</sub> O/CH <sub>3</sub> CN (9:1) | Trace |
| 13              | -                               | H <sub>2</sub> O/CH <sub>3</sub> CN (9:1) | -     |
| 14 <sup>c</sup> | Cs <sub>2</sub> CO <sub>3</sub> | H <sub>2</sub> O/CH <sub>3</sub> CN (9:1) | 10    |
| 15 <sup>d</sup> | Cs <sub>2</sub> CO <sub>3</sub> | H <sub>2</sub> O/CH <sub>3</sub> CN (9:1) | 5     |
| 16 <sup>e</sup> | Cs <sub>2</sub> CO <sub>3</sub> | H <sub>2</sub> O/CH <sub>3</sub> CN (9:1) | 41    |

<sup>a</sup> Reaction conditions: **1a** (1 mmol), base (1 eq), solvent (2 ml), photocatalyst (10 mg) at room temperature; <sup>b</sup>Yield of the isolated product; <sup>c</sup>Under argon atmosphere; <sup>d</sup>Conducted at dark; <sup>e</sup> Using 5 mg photocatalyst.

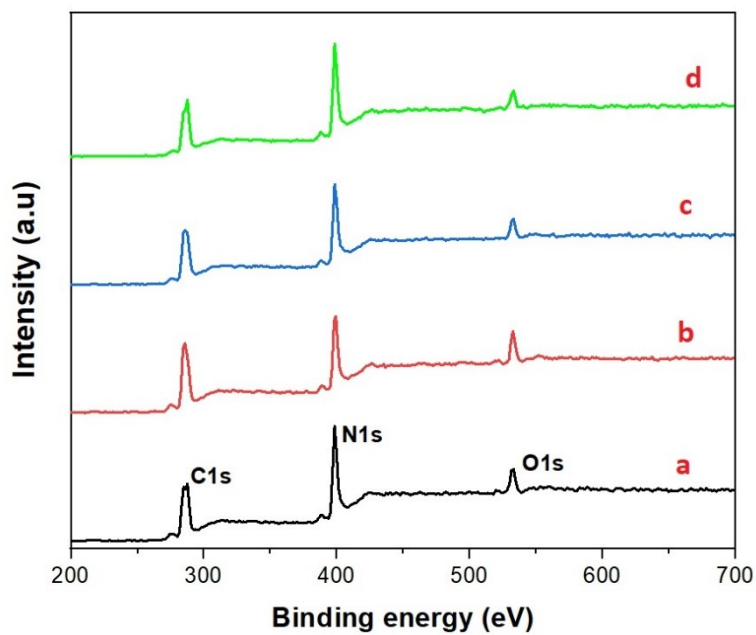

**Figure S1.** XPS spectrums of (a) CN, (b) 1%-BTCN (c) 0.5%-BTCN (d) 0.05%-BTCN

## Data of reused catalyst

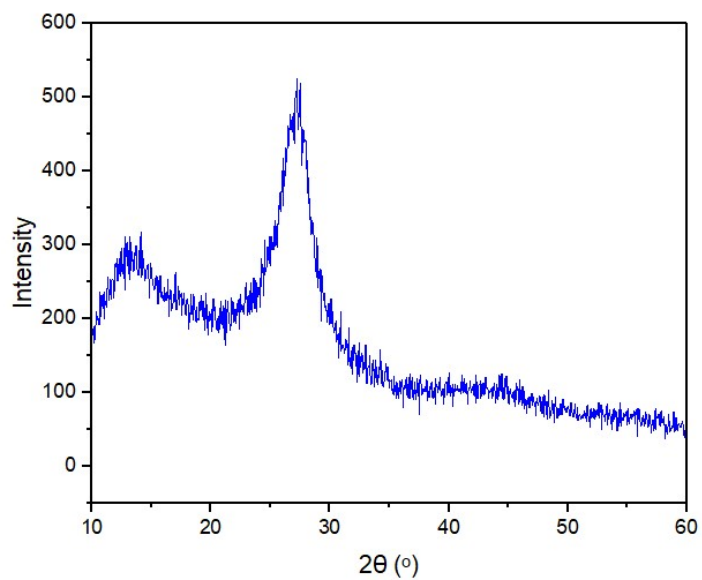

**Figure S2.** XRD pattern of a reused catalyst (re-0.05%BTCN)

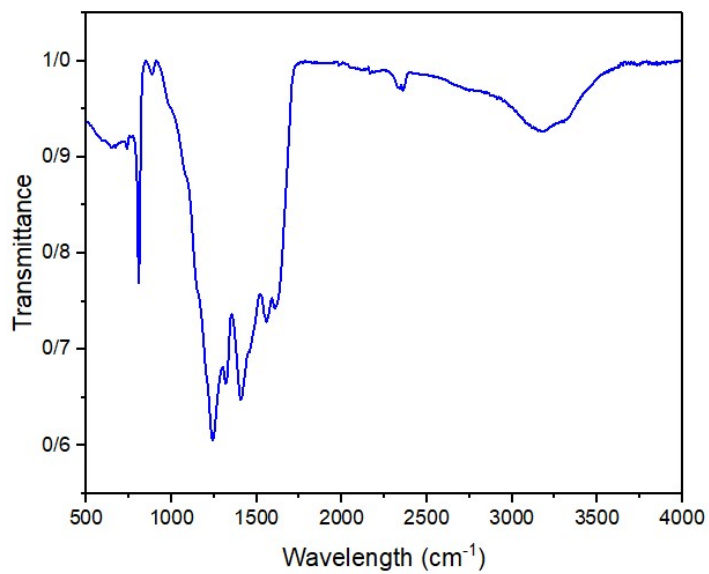

**Figure S3.** FTIR spectrum of a reused catalyst (re-0.05%BTCN)

**Table S3.** Textural properties reused catalyst

| Samples       | BET surface area ( $\text{m}^2\text{g}^{-1}$ ) | Pore volume ( $\text{cm}^3\text{g}^{-1}$ ) | Pore size (nm) |
|---------------|------------------------------------------------|--------------------------------------------|----------------|
| re-0.05%-BTCN | 74.531                                         | 0.2751                                     | 14.765         |

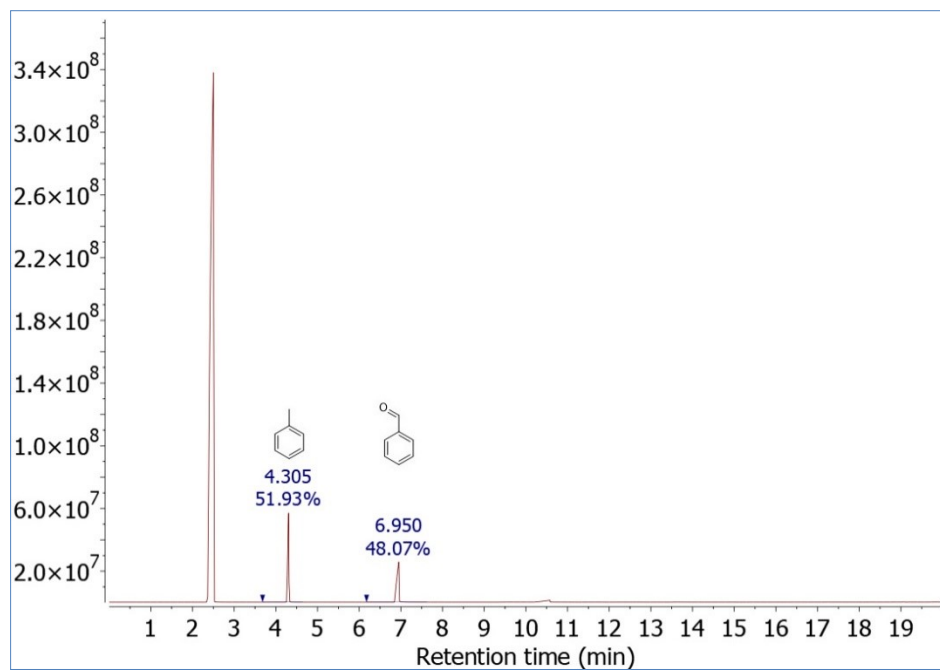

**Figure S4.** GC chromatography spectrum of reaction by CN photocatalyst

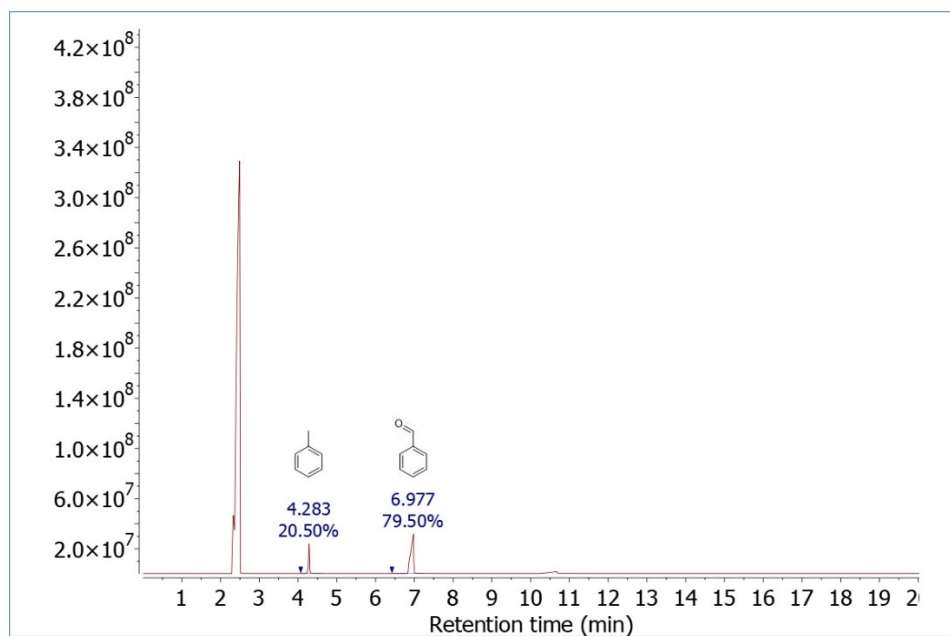

**Figure S5.** GC chromatography spectrum of reaction by 0.5%-BTCN photocatalyst

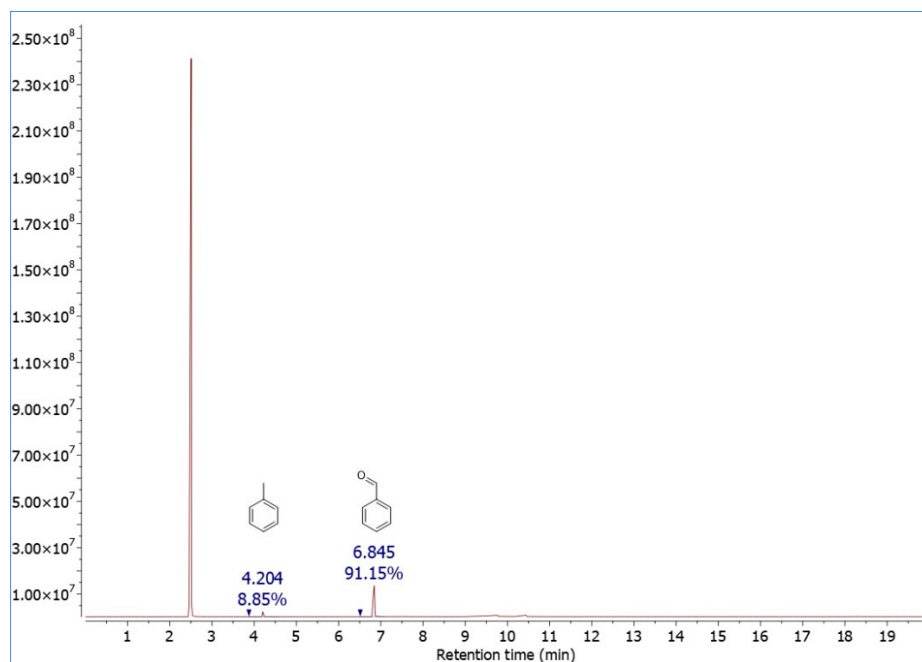

**Figure S6.** GC chromatography spectrum of reaction by 0.05%-BTCN photocatalyst

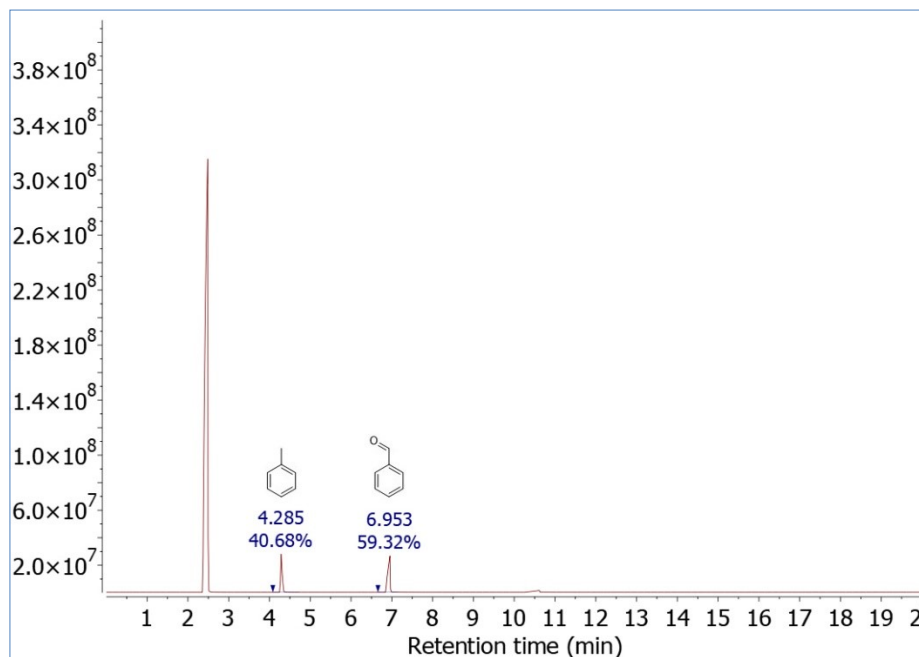

**Figure S7.** GC chromatography spectrum of reaction by 1%-BTCN photocatalyst

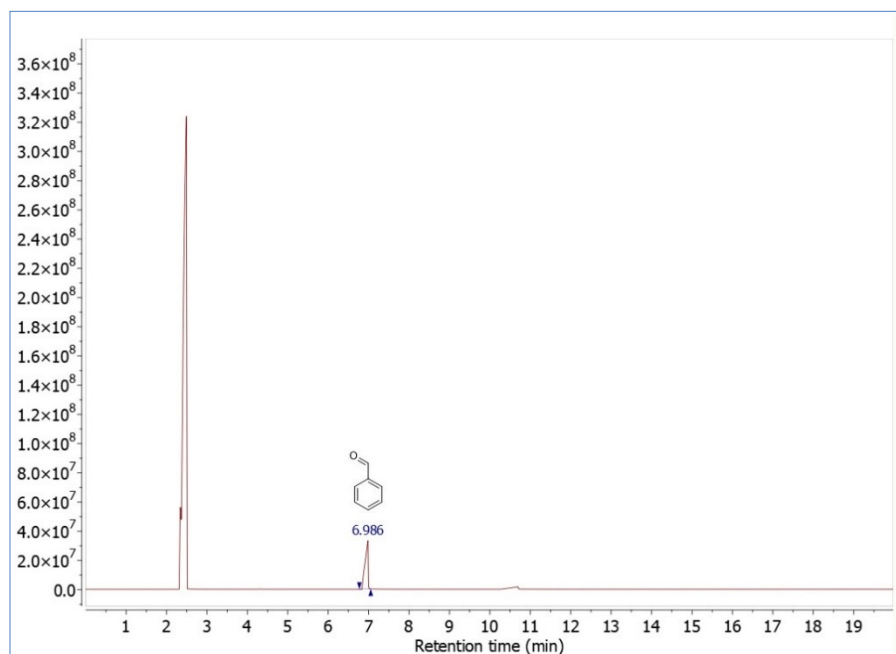

**Figure S8.** GC chromatography spectrum of Benzaldehyde reference

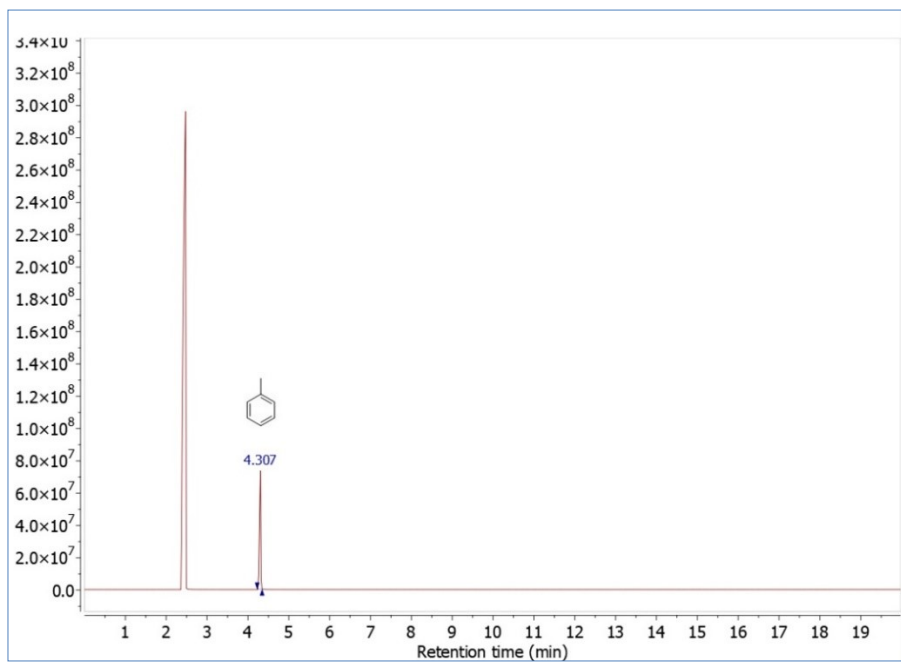

**Figure S9.** GC chromatography spectrum of Toluene reference
